# Supplementary material
Source: publisher site journal article supplement (https://www.dovepress.com/article/368219)
Supplement: Supplementary file 1 [file get_supplementary_file.php]

**Supplementary materials**

**Supplementary Table S1: Characteristics of SHEHS participants with high or normal range TSH**

|  | Total | TSH | TSH | P value |
| --- | --- | --- | --- | --- |
|  |  | normal range | high |  |
| Number | n=3800 | n=3047 | n=753 |  |
| TSH,mIU/L | 3.43 (3.37-3.50) | 2.71 (2.68-2.74) | 6.26 (6.05-6.47) | <0.001 |
| ASCVD, % (n) | 21.7 (826) | 20.7 (621) | 25.6 (205) | 0.002 |
| Smoker, % (n) | 14.0 (532) | 16.0 (479) | 6.6 (53) | <0.001 |
| Hypertension, % (n) | 75.1 (2852) | 74.1 (2224) | 78.6 (628) | 0.009 |
| Diabetes, % (n) | 20.7 (788) | 19.6 (589) | 24.9 (199) | 0.001 |
| SBP, mmHg | 138.9 (138.3-139.4) | 138.4 (137.8-139.1) | 140.6 (139.4-141.8) | 0.002 |
| BMI, kg/m2 | 24.60 (24.49-24.71) | 24.56 (24.44-24.68) | 24.78 (24.53-25.03) | 0.105 |
| WC, cm | 86.7 (86.4-87.0) | 86.6 (86.2-86.9) | 87.3 (86.6-88.0) | 0.068 |
| HbA1c, % | 6.35 (6.31-6.39) | 6.33 (6.30-6.37) | 6.41 (6.33-6.49) | 0.095 |
| FG, mmol/L | 5.76 (5.70-5.81) | 5.72 (5.66-5.79) | 5.88 (5.74-6.02) | 0.051 |
| TC, mmol/L | 4.98 (4.95-5.02) | 4.98 (4.95-5.01) | 5.00 (4.93-5.07) | 0.615 |
| LDL-C, mmol/L | 3.31 (3.28-3.33) | 3.30 (3.27-3.33) | 3.33 (3.27-3.40) | 0.375 |
| HDL-C, mmol/L | 1.46 (1.45-1.47) | 1.46 (1.45-1.48) | 1.45 (1.43-1.48) | 0.603 |
| TG, mmol/L | 1.62 (1.58-1.65) | 1.61 (1.57-1.65) | 1.64 (1.57-1.71) | 0.363 |
| Cr, mmol/L | 76.9 (76.1-77.7) | 76.5 (75.8-77.4) | 78.3 (76.1-77.7) | 0.070 |
| UA,μmmol/L | 328.6 (325.9-331.4) | 327.5 (324.4-330.6) | 332.9 (326.6-339.2) | 0.121 |
| Hcy, μmmol/L | 15.9 (15.6-16.2) | 15.7 (15.4-16.0) | 16.8 (16.0-17.5) | 0.003 |
| Hgb,g/L | 138.2 (137.8-138.7) | 138.8 (138.3-139.4) | 136.1 (135.0-137.1) | <0.001 |
| hsCRP,mg/L | 2.28 (2.12-2.44) | 2.28 (2.09-2.47) | 2.27 (1.98-2.57) | 0.942 |

Data are presented as mean (95%CI) for continuous variables and n (%) for categorical variables. TSH, thyroid stimulating hormone; ASCVD, arteriosclerotic cardiovascular disease, includes history of MI, coronary or other arterial revascularization, stroke, or peripheral arterial disease; WC, waist circumference; BMI, body mass index; SBP, systolic blood pressure; FG, fasting glucose; HbA1c,glycosylated hemoglobin; TC, total cholesterol; LDL-C, low density lipoprotein cholesterol; HDL-C, high density lipoprotein cholesterol; TG, triglyceride; Cr, Creatinine; UA, Uric acid; Hcy, serum total homocysteine; Hgb, hemoglobin; hsCRP, high-sensitivity C-reactive protein

**Supplementary Table S2: Characteristics of participants stratified by CVD death in normal or high TSH range**

|  | Total | Survival | All-cause death | CVD death | P value |
| --- | --- | --- | --- | --- | --- |
| Number | n=3800 | n=3359 | n=441 | n=174 |  |
| TSH, mIU/L | 3.48 (3.40-3.57) | 3.43 (3.35-3.52) | 3.78(3.69-4.62) | 4.29 (3.82-4.77) | <0.001 |
| ASCVD, % (n) | 21.7 (826) | 21.1 (773) | 31.3 (139) | 40.8 (71) | <0.001 |
| Hypertension,% (n) | 57.3(2178) | 56.1(1884) | 66.7(294) | 74.7(130) | <0.001 |
| SBP, mmHg | 138.9 (138.3-139.4) | 138.8 (138.1-139.2) | 140.2(138.8-144.1) | 142.0 (139.8-145.2) | 0.036 |
| DBP, mmHg | 81.8 (81.5-82.1) | 81.8 (81.5-82.1) | 81.7 (79.9-83.2) | 81.7 (79.8-83.5) | 0.892 |
| BMI, kg/m2 | 24.60 (24.49-24.71) | 24.61 (24.50-24.73) | 24.46(23.51-24.73) | 24.18 (23.54-24.83) | 0.159 |
| Diabetes,% (n) | 16.8(640) | 15.5(519) | 27.4(121) | 28.7(50) | <0.001 |
| HbA1c, % | 6.35 (6.31-6.39) | 6.32 (6.29-6.36) | 6.58(6.42-6.88) | 7.01 (6.70-7.31) | <0.001 |
| FG, mmol/L | 5.76 (5.70-5.81) | 5.71 (5.65-5.77) | 6.23(6.16-7.04) | 6.81 (6.24-7.37) | <0.001 |
| TC, mmol/L | 4.98 (4.95-5.02) | 5.00 (4.97-5.03) | 4.86(4.66-5.02) | 4.84 (4.65-5.02) | 0.073 |
| LDL-C, mmol/L | 3.31 (3.28-3.33) | 3.32 (3.29-3.35) | 3.16(2.97-3.28) | 3.12 (2.97-3.28) | 0.016 |
| HDL-C, mmol/L | 1.46 (1.45-1.47) | 1.46 (1.45-1.47) | 1.45(1.42-1.48) | 1.43 (1.36-1.49) | 0.314 |
| TG, mmol/L | 1.62 (1.58-1.65) | 1.62 (1.59-1.66) | 1.62 (1.56-1.74) | 1.62 (1.44-1.81) | 0.929 |
| Cr,μmol/L | 76.9 (76.1-77.7) | 75.9 (75.2-76.6) | 91.6(83.4-101.7) | 92.8 (82.8-102.8) | <0.001 |
| Hcy, μmol/L | 15.9 (15.6-16.2) | 15.6 (15.3-15.9) | 19.2(17.4-21.8) | 20.5 (17.9-23.2) | <0.001 |

Data are presented as mean (95%CI) for continuous variables and n (%) for categorical variables. TSH, thyroid stimulating hormone; ASCVD, arteriosclerotic cardiovascular disease, includes history of MI, coronary or other arterial revascularization, stroke, or peripheral arterial disease; WC, waist circumference; BMI, body mass index; SBP, systolic blood pressure; DBP, diastolic blood pressure; FG, fasting glucose; HbA1c,glycosylated hemoglobin; TC, total cholesterol; LDL-C, low density lipoprotein cholesterol; HDL-C, high density lipoprotein cholesterol; TG, triglyceride; Cr, Creatinine; UA, Uric acid; Hcy, serum total homocysteine; Hgb, hemoglobin; hsCRP, high-sensitivity C-reactive protein
